# Supplementary material
Source: publisher site journal article supplement (https://www.dovepress.com/article/587819)
Supplement: Supplementary file 1 [file 587819%20Supplementary%20Material_2.docx]

**Table S1. Vertical Translation Thresholds in Different Laying Positions.**

| Position | Threshold (CI) [cm/s] |
| --- | --- |
| Supine | 4.15 (2.95 – 5.86) |
| Prone | 4.25 (3.29 – 5.49) |
| Right Ear Down | 4.02 (3.02 – 5.36) |
| Left Ear Down | 4.16 (3.03 – 5.71) |
| Median | 4.19 (3.33 – 5.26) |

Vertical translation thresholds did not significantly differ with head and body orientation (F(4,32) = 0.066, p = .992).Since vertical translation thresholds are log-normally distributed, the geometric mean and 95% confidence intervals of awake vertical translation thresholds when lying supine, prone, right ear down, or left ear down were calculated instead of mean and standard deviation. *CI = 95% confidence interval, cm/s = centimeters per second.*

**Table S2. Means and Standard Deviations of Sleep Stages Across Conditions.**

| Sleep Stage | Acclimation | Baseline | 0-100% | 0-600% |
| --- | --- | --- | --- | --- |
| Time Asleep | 457.85 (12.78) | 440.07 (24.79) | 422.69 (34.33) | 443.73 (22.71) |
| Time Awake | 22.54 (13.19) | 32.04 (16.45) | 48.92 (35.07) | 32.72 (19.21) |
| N1% | 8.10 ( 9.61) | 8.28 ( 3.55) | 11.73 ( 6.69) | 9.80 ( 5.16) |
| N2% | 48.89 ( 8.85) | 49.66 ( 7.64) | 48.59 (10.84) | 49.76 ( 8.52) |
| N3% | 25.57 ( 7.53) | 21.61 ( 9.01) | 19.67 (11.33) | 18.49 (10.01) |
| R% | 17.44 ( 4.85) | 20.43 ( 5.98) | 19.99 ( 4.56) | 21.95 ( 3.00) |

Means of time spent awake and asleep, as well as the percent of time asleep spent in NREM1, NREM2, NREM3, and REM. Mean (Standard Deviation), N1% = NREM1, N2% = NREM2, N3% = NREM3, R% = REM.
